# Supplementary material
Source: publisher site journal article supplement (https://www.dovepress.com/article/530776)
Supplement: Supplementary file 1 [file 530776%20Supplementary%20Material.docx]

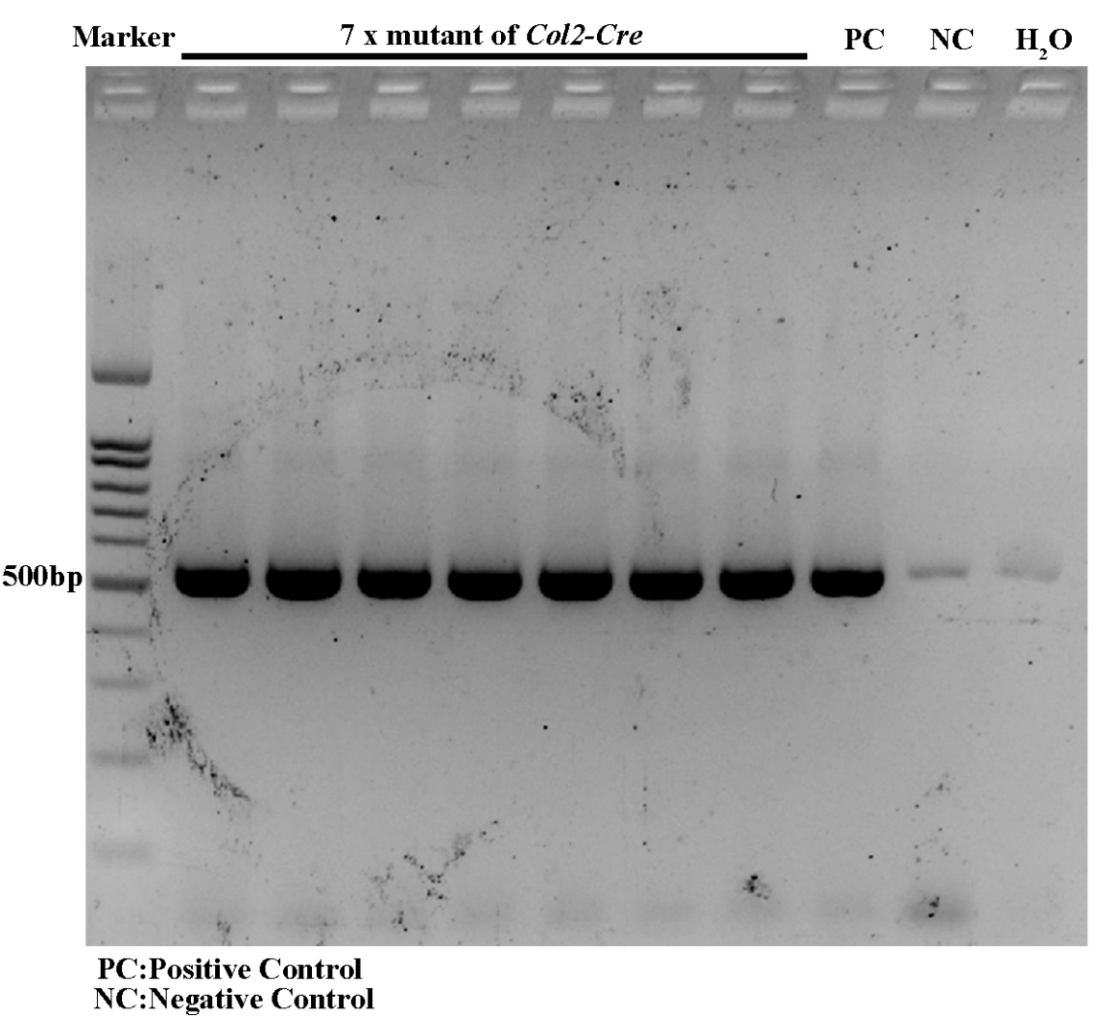


**Fig S1 Gene identification of Col2-Cre.**

**
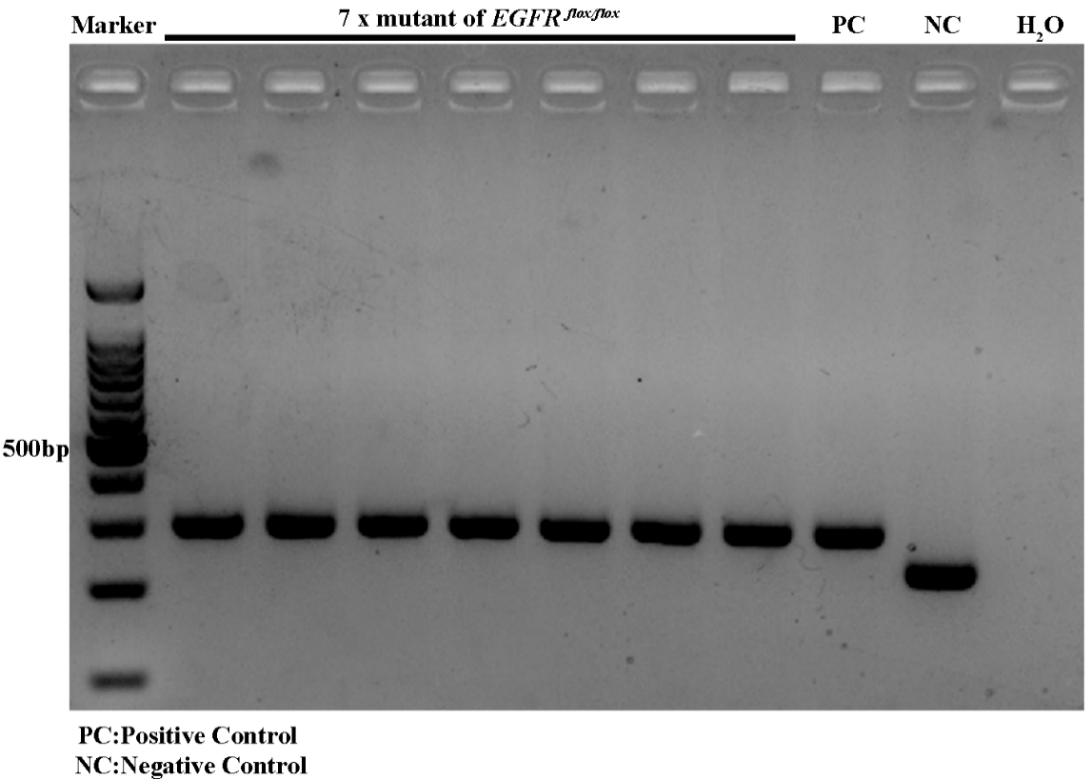
**

**Fig S2 Gene identification of EGFRflox/flox.**

**
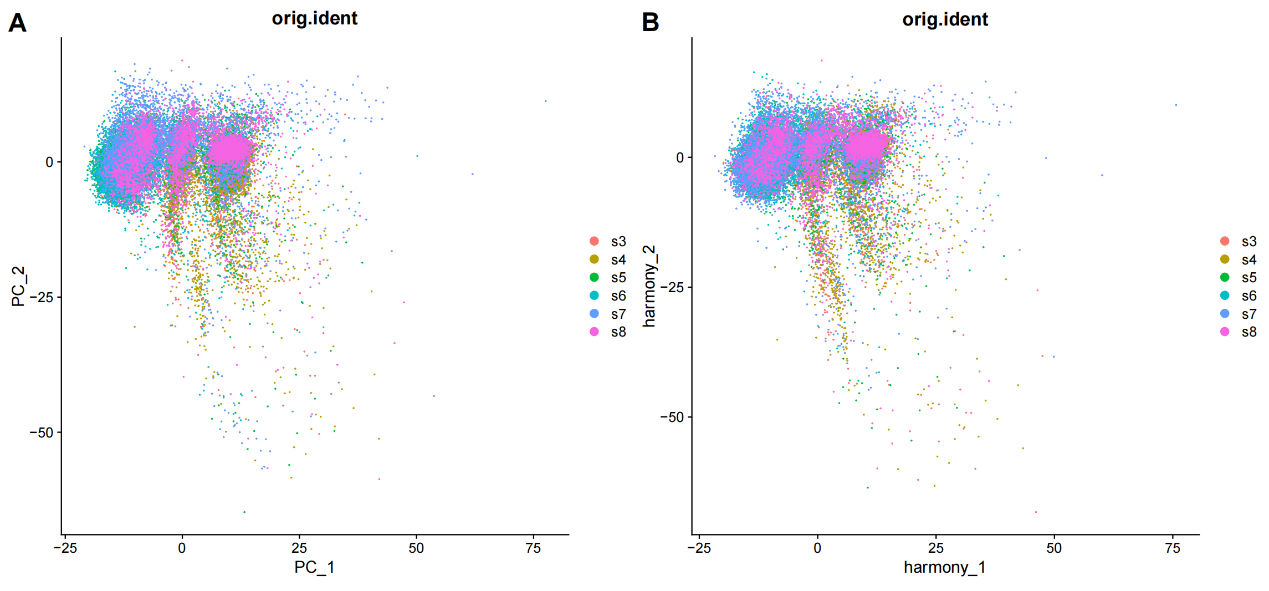
 Fig S3 Validation of batch effect correction in scRNA-seq data.** (A) Uncorrected PCA demonstrates sample separation (indicating batch effects). (B) Samples become intermixed following Harmony correction.

Table S1 Marker gene and function of NPC subpopulation

| NPC subtypes | Gene markers | Function |
| --- | --- | --- |
| fibrous NPC(Fib-NPC) | COL1A1, COL3A1, COL6A1, PRSS23，MMP2 | Late-stage degenerative NPC |
| homeostatic NPC(Hom-NPC) | RPS29 | Modulates intracellular homeostasis and circadian regulation |
| hypertrophic chondrocyte-like NPC 1(HTC-1) | FRZB | Associated with cell adhesion and connective tissue development |
| hypertrophic chondrocyte-like NPC 2(HTC-2) | DKK1 | Involved in catabolism, extracellular matrix organization and mineralization |
| effector NPC(Eff-NPC) | HMGCS1 | Involved in cell signaling |
| regulatory NPC(Reg-NPC) | CHI3L1 | Mediates cellular metabolism and immune regulation |

Table S2

| ABHD2 | SMOC1 | PLPP3 | FAM114A1 | APLP2 | SESN3 | PPP1R3C | SRSF2 |
| --- | --- | --- | --- | --- | --- | --- | --- |
| ABL2 | C11orf58 | PIGP | GTF2H5 | PALLD | CAPG | FAT1 | LTA4H |
| ADAM12 | ADAM10 | CLCF1 | EMP2 | GOLGA4 | CHMP5 | EAPP | CENPA |
| ADAMTS2 | CHSY1 | ATF4 | PGM1 | GOLGB1 | TRIO | C4orf3 | SLTM |
| AHNAK | ALDH1L2 | DSTN | RAD21 | CCL20 | SOS1 | CCDC88A | C5orf24 |
| ANTXR1 | SUSD6 | DAD1 | TMTC3 | CD276 | KDELR1 | IRS2 | MRPL34 |
| ANXA1 | KIF1C | RPS4Y1 | NREP | EIF3E | NCKAP1 | ARID4B | ITGA1 |
| APOD | LUZP1 | THBS1 | RBMX | CDH13 | IL32 | ZC3HAV1 | BLZF1 |
| AQP1 | ATP5EP2 | CRABP2 | EFR3A | AEBP1 | CSN1S1 | GANAB | LGR4 |
| ARL4C | SLC2A5 | TRPS1 | SPRED1 | BTF3 | CELF1 | HLA-C | CHID1 |
| ASPN | FOSL2 | NID1 | CAMK2N1 | PDGFRB | TMEM243 | TMEM167A | CYLD |
| C2orf40 | SH3BP5 | SEMA5A | STXBP5 | KRT10 | ZCCHC6 | KMT2E | ABLIM3 |
| CALD1 | NT5DC2 | KIDINS220 | CDCA5 | MAN1A1 | TMEM256 | ITGB8 | TOP1 |
| CALU | C2orf82 | UQCRH | UBE3A | DUSP14 | MARVELD1 | PRICKLE2 | CPEB4 |
| CD109 | SEC24D | SMIM3 | ZBTB43 | PNRC2 | ATP5O | FAM46A | HSBP1 |
| CD44 | LRRFIP2 | BMPR2 | XPR1 | LMAN1 | MLLT1 | MAP3K20 | CBLB |
| CDH11 | DIP2C | TNFRSF12A | IGF1 | VCAN | DSE | LAMTOR5 | CENPU |
| CLEC3A | MEX3D | CFH | PCNX1 | SRSF3 | HAPLN1 | CCBE1 | HIPK3 |
| CNMD | RIF1 | SAP18 | PPIC | SAT1 | IFI16 | FXYD6 | HTRA3 |
| COL11A1 | FAM129B | ERH | NDUFA11 | RPL19 | DIAPH1 | SCARB2 | MBTPS1 |
| COL12A1 | LHFPL2 | SNAI2 | CDC5L | OMD | PHIP | PTGES | DICER1 |
| COL14A1 | HSPA4 | MAP3K8 | MYH10 | IL1R1 | CRIPT | PDLIM1 | RAC1 |
| COL15A1 | MAGEH1 | MACF1 | SPON1 | MT-ND6 | SH2B3 | PELO | LYRM1 |
| COL1A1 | STK26 | OST4 | CCNB2 | RPS3A | FZD7 | BEX5 | UBE2T |
| COL1A2 | CA12 | ANKH | NUF2 | PDGFRA | CXCL8 | DNAJC19 | XRN1 |
| COL3A1 | TMEM230 | TTC3 | CUX1 | CXCL12 | ARHGAP23 | TM2D3 | TMEM5 |
| COL4A1 | COLGALT1 | COL2A1 | ATF7IP | LRRC17 | RNF144A | EP300 | SH3KBP1 |
| COL4A2 | PTPN12 | ASPM | CLDND1 | COL5A3 | ARHGAP21 | MED13 | KPNA6 |
| COL5A1 | CTTN | TMSB10 | PTBP1 | F3 | BAG3 | THBS3 | TMEM60 |
| COL5A2 | TRIP12 | ATP6V1G1 | MRPL50 | MYO1B | SPATS2L | CWC15 | EIF2AK2 |
| COL6A1 | EIF4A2 | TGIF1 | SAMD9 | LGALS3 | PAPPA | RPS10 | SCAF11 |
| COL6A2 | EBF1 | BNIP3 | SAMD9L | MT-CYB | SNRPF | ARSB | RASSF8 |
| COL6A3 | SNX9 | BPTF | RDX | SRSF7 | PEBP1 | ITPRIP | TMBIM4 |
| COL8A1 | LNPEP | SKI | ATP8B2 | SNRPG | TUBA1C | NR3C1 | CAMK2D |
| COMMD6 | CNN2 | CAST | IL1RL1 | AKAP13 | HGSNAT | CNN3 | MAN2B2 |
| COX7C | CREB3L1 | INO80C | EPAS1 | PRRC2C | RASAL2 | OLMALINC | GUCY1B3 |
| CRTAC1 | SDC4 | EPB41L4A-AS1 | LAMB2 | TCF4 | RAN | RNF130 | ZNF827 |
| CRYAB | SMAD7 | MFGE8 | AP3D1 | JUND | RRAGC | UNC5B | UBR2 |
| CYCS | HOXB6 | COX17 | CCNG2 | LAMA4 | DTNA | SLC7A2 | ICMT |
| CYP1B1 | PLPP5 | DYNC1H1 | MALSU1 | RPS5 | SLN | HNRNPUL1 | FAM229B |
| CYR61 | USP7 | HSD3B7 | EIF4G3 | KTN1 | MYBL1 | DKK1 | GPN3 |
| CYTL1 | MYO1D | MTHFD2 | TSPAN11 | SPOCK1 | RNF213 | CAMSAP2 | PSMB3 |
| DCN | SNRPD1 | ENY2 | ACLY | PCOLCE | DNAJB4 | PDCD6 | GAPVD1 |
| DKK3 | C14orf132 | LAMP1 | GNG11 | HINT1 | ADGRE5 | TSHZ3 | LTBR |
| DST | KDM2A | AFF4 | KIAA1109 | GNB1 | PTPRA | PTPRD | CETN3 |
| EEF1A1 | SLC2A3 | CREG1 | WBP1L | RPS27 | MYO1C | FAM198B | IFNAR1 |
| EIF1 | QSER1 | HDLBP | TMEM123 | RPL4 | COX6B1 | SOX9 | DLG5 |
| EIF3H | CD4 | KIF1B | DNAJC3 | EIF3A | RPL22L1 | RRM2 | PSME4 |
| F13A1 | NUFIP2 | PHACTR2 | SLC25A4 | TACC1 | CD9 | C1D | TNFRSF10D |
| FBN1 | TPP1 | CAPN2 | MRPL3 | COX6C | GAS2L3 | SNU13 | SNRNP200 |
| FGFBP2 | ATP1B1 | TUBA1B | TRIM22 | NDUFC1 | FOS | ANKRD28 | METTL7A |
| FHL2 | RPS2 | YWHAG | JCAD | LIMA1 | KDM7A | ANKRD11 | OR7C1 |
| FN1 | TGOLN2 | BCAS2 | MAPK14 | RBP4 | PFKFB3 | MELK | ARHGAP28 |
| FRZB | CETN2 | GOLGA3 | TMEM38B | PLXDC2 | EBAG9 | PTP4A2 | KLHL21 |
| FSTL1 | TNFAIP3 | AL035258.1 | TIMMDC1 | SEMA3C | CCDC6 | ANO6 | TATDN1 |
| GJA1 | QSOX1 | CAMK1D | ANK2 | ZEB2 | ZYG11B | ARHGAP11A | ALG5 |
| GPNMB | KCTD3 | TM2D1 | HSP90B1 | LUM | PRR13 | MRPS33 | MFHAS1 |
| H3F3B | RASA3 | EEA1 | MIS12 | C12orf75 | RPS6KA3 | SYNE2 | VEGFA |
| HSPA1A | LSM3 | ESYT2 | LAMTOR3 | ENAH | HERC1 | BEX2 | PPP2R3A |
| HSPA1B | DIXDC1 | ATP5E | ATP5H | GLUL | ATP1A1 | SOCS3 | ARHGEF10L |
| IDI1 | COPS9 | POMP | ENDOD1 | FZD1 | CLIC4 | NAV2 | CACYBP |
| IGFBP3 | EIF2S2 | ACTG1 | IGF2BP2 | BCAT1 | AHR | CCND1 | TBC1D10B |
| IGFBP5 | PRKAR2A | COL8A2 | BIRC6 | CDK2AP1 | SERINC1 | ARID1A | SLC35G2 |
| IQGAP1 | PNO1 | BLOC1S2 | ANXA6 | BASP1 | C1S | TMEM43 | BTBD1 |
| ISLR | CERCAM | TAOK1 | DDB1 | FAM162A | TMEM126A | UGCG | RUBCNL |
| ITGB1 | TOP2B | ANLN | KLHL42 | ZC3H6 | DNAJB9 | CLDN4 | SOGA1 |
| ITM2A | RPLP2 | RPL41 | USP9X | PRDX1 | MRPL32 | HSPE1 | CENPW |
| LAMB1 | KCNE4 | SS18L2 | VMP1 | NDUFAB1 | REV3L | MED31 | ZNF451 |
| LGALS1 | CAPNS1 | GTF2B | SAMD4A | AKAP9 | LIFR | PGM2L1 | SCFD1 |
| LOXL2 | AGO2 | TPX2 | CDC42SE1 | VEGFC | STX2 | SVIP | PPA2 |
| LRRC15 | TNRC6A | SLIT3 | DHX9 | RPL9 | TRMT10C | BRK1 | KIF2C |
| LTBP1 | QKI | C11orf96 | KBTBD11 | TMEM59 | KRCC1 | UQCRQ | CRIM1 |
| LTBP2 | PDE4DIP | ATP5J | AGAP1 | BTG2 | SUN2 | GAS1 | PTPN11 |
| MALAT1 | TMF1 | TGFB2 | LIMS1 | ITPRIPL2 | MBIP | PBK | APIP |
| MGP | ZBTB7A | ZNF106 | MGEA5 | OLFML3 | CREBRF | NRP1 | CDC37L1 |
| MMP13 | KLF7 | DYNC1LI2 | RNF13 | HMCN1 | MED1 | SBDS | ECM2 |
| MMP2 | SEC23A | VCL | SMIM7 | FNDC1 | KIF3B | TRAM2 | STRAP |
| MMP3 | DCBLD2 | GOLM1 | SNRPB2 | CKAP4 | XIAP | IDS | ORMDL1 |
| MRPL33 | GSTA4 | FAU | PARP1 | MSN | EYA2 | CGAS | KLF13 |
| MT-ND2 | PLIN3 | COPA | TXNDC12 | RPLP1 | COL4A3BP | IRF1 | E2F3 |
| MT-ND4 | SLC7A8 | NDUFS4 | HMGCR | CHCHD2 | DEPDC1 | HMGCS1 | UTP18 |
| MT1E | RABGGTB | CTSZ | ATXN2L | CAVIN1 | LRP10 | WNT5A | BOD1 |
| MT1G | PDIA3 | DLC1 | NSD2 | LRP1 | REEP5 | FMOD | TRIM56 |
| MT1X | USP22 | PLAU | MEGF8 | MICAL2 | LRIF1 | TRIP11 | IQSEC1 |
| MT2A | CFAP36 | AC005165.1 | ARFGEF1 | ITGAV | PCM1 | ITGB1BP1 | SMARCA4 |
| MXRA5 | CHI3L2 | SMIM19 | AIG1 | ZFP36L2 | MORN2 | GLRX | C6orf62 |
| NACA | SEL1L | FAM129A | DOCK11 | TUBB | LSM8 | DDX3X | MYCBP2 |
| OGN | FGFR1OP2 | PTS | KIF11 | PTN | RAB30-AS1 | PHLDA1 | ERC1 |
| OLFML2B | MTPN | SYNCRIP | YPEL5 | KPNB1 | BRD4 | SERTAD2 | UNC50 |
| PCOLCE2 | SETX | CPT1A | KIF18B | CLU | INSL4 | UBE2B | ARL1 |
| PLA2G2A | ZFP91 | SPTSSA | ENKUR | APCDD1L | HECA | CFI | CGRRF1 |
| POSTN | ZNF281 | NUCKS1 | AHCTF1 | BAMBI | ASXL2 | FGF2 | VCP |
| PRDX4 | RAPGEF2 | RORA | RUNX2 | SMC4 | SORBS2 | NDUFB3 | HECW2 |
| PRG4 | GALNT2 | LARP1 | MYL9 | FAP | KIF9 | CFAP20 | MRPL40 |
| PRSS23 | MARCKSL1 | CD70 | PDK4 | SNHG8 | ADGRF5 | SPRY4 | SLC27A2 |
| RAB31 | XYLT1 | SURF4 | PODXL | NEXN | TSG101 | PPTC7 | BDP1 |
| RCAN1 | NDRG2 | CENPE | NUP62 | ECM1 | NOV | NDC80 | SIVA1 |
| RGCC | COLGALT2 | RB1CC1 | MMAB | ADAM9 | KDM5C | GOLGA2 | MRPS31 |
| RPL10A | SERP1 | BOD1L1 | APPL1 | SERPINA5 | ATP11B | BICD2 | PTGER4 |
| RPL11 | DUSP10 | HEG1 | CCND2 | LMNA | IMPAD1 | NBDY | SSRP1 |
| RPL15 | PRKDC | AMTN | TOB1 | MAP4 | PLIN2 | BEX4 | PRKCH |
| RPL23 | RBMS1 | NDUFAF4 | UBE2H | MMADHC | BMP1 | WWTR1 | FBLN2 |
| RPL24 | REL | TMEM45A | PPIL3 | DBI | GOT1 | GLUD1 | BORCS7 |
| RPL26 | MME | LINC02095 | PDE4B | ABI3BP | SYNDIG1 | JAK1 | PLAC9 |
| RPL27 | SERPINI1 | PSMB1 | TMEM216 | ZBTB20 | CIT | MRPL20 | TWSG1 |
| RPL27A | C8orf59 | GPR68 | NDUFV2 | FOXO3 | SPC25 | ZBTB38 | COL7A1 |
| RPL30 | NFATC2 | ALCAM | DNAJA4 | WISP3 | PCYOX1 | SRP19 | MDH1 |
| RPL31 | PPP1R15A | NOTCH2 | RPL7 | THY1 | AK6 | AOC2 | AP2B1 |
| RPL32 | KIF13B | ITGA11 | NCAPG | TMEM119 | RC3H1 | ANTXR2 | DDAH2 |
| RPL34 | ARF4 | ANAPC16 | TIMM10B | ZNF90 | GSK3B | NDUFB4 | DYNC1I2 |
| RPL35A | TRIB1 | EFEMP1 | SLC7A1 | MRPS6 | HNRNPR | FOXO1 | PECAM1 |
| RPL37 | SHCBP1 | ANO1 | STX16 | IGFBP4 | ERBIN | SMIM14 | BTF3L4 |
| RPL37A | KIF14 | KANK2 | MINDY2 | MAMDC2 | IPO7 | TRAK2 | NCOR2 |
| RPL38 | PRPF40A | TBCA | HAX1 | SLIRP | PTBP3 | SNRPE | ACBD3 |
| RPL5 | SYNE1 | PAIP2 | LYPLAL1 | ANPEP | ECT2 | LHFPL6 | IKBIP |
| RPS12 | DPM1 | NGF | CDK19 | STEAP4 | CMC1 | DEDD2 | IL4R |
| RPS13 | P4HB | EIF5 | NFKB1 | SPAG9 | EHD2 | XBP1 | TAF12 |
| RPS15A | FGF1 | SPON2 | NUP153 | SUSD5 | WDR26 | SMIM26 | MLF1 |
| RPS17 | CTNND1 | NOTCH3 | IGF2R | LAMC1 | FNDC3B | ZMAT3 | NUPR1 |
| RPS20 | FUT11 | EIF5B | SNRNP27 | CA5B | TAOK3 | SMDT1 | PLRG1 |
| RPS21 | VPS13C | KREMEN1 | ITGA10 | TYMS | MORF4L1 | BAZ1A | UTP11 |
| RPS23 | PTPRD-AS1 | HAS1 | PPIL1 | SGCD | PPFIBP1 | OSMR | A4GALT |
| RPS24 | EDNRA | HEBP2 | TNRC6C | NHSL2 | PLOD1 | CD99 | SEC63 |
| RPS25 | ZFAND1 | SERF2 | TMEM14A | ATRAID | CTSL | ALDOC | FGGY |
| RPS27A | FAM126A | LITAF | CALR | CLTC | UHMK1 | SRP9 | NSD3 |
| RPS29 | RSRC2 | PID1 | LCOR | NDUFB1 | EIF3L | ERAP2 | TXNL1 |
| RPS3 | NFIB | NDUFB9 | APOL6 | TLN1 | SAMD1 | ANK3 | GNAI2 |
| RPS4X | PIGH | IGFBP7 | BCL10 | TSPAN13 | HAT1 | CDK1 | TMEM18 |
| RPS6 | GJC1 | FGFR1 | USP34 | MIA | FUNDC2 | AUTS2 | RUNX1T1 |
| RPS8 | DNAJC12 | SEM1 | TNRC6B | MAFB | ULBP2 | GSN | MEG3 |
| S100A6 | TCF7L2 | TPM3 | IGF1R | UACA | DNMT1 | TPD52 | SLC23A2 |
| S100B | CREBBP | SFT2D1 | KIF23 | FAM120A | WDFY1 | CP | CD24 |
| SCRG1 | ZCCHC24 | MIR22HG | EXT1 | CADM1 | KIAA1644 | CHD4 | SRI |
| SEC61G | GNG12 | DDX21 | SETBP1 | PLS3 | FRMD6 | LRRC8C | SDHB |
| SERPINA1 | GRN | RBPJ | MRPL39 | SLK | TTYH3 | PARK7 | BICC1 |
| SERPINE2 | KNL1 | WIPF1 | SECISBP2L | TAGLN2 | PLXNA2 | CREM | KAT6B |
| SERPINF1 | AGT | SNX3 | SBNO1 | CNBP | GNAQ | CTDSP2 | EIF2A |
| SERPINH1 | G0S2 | TXN | ACADVL | SEC61B | SYNE3 | HUWE1 | PHF20L1 |
| SFRP4 | CDK7 | MMP1 | TMEM219 | UQCRHL | AP2M1 | WRB | ATRNL1 |
| SLC38A2 | B4GALT5 | SF3B6 | CYFIP1 | JTB | APPL2 | OSER1 | C1QTNF6 |
| SLPI | ACTA2 | EIF1B | RPL8 | CHCHD7 | LIF | NDUFA5 | SCIN |
| SOD1 | HIPK1 | UAP1 | TRIM33 | RCN2 | TMED4 | TMA7 | ACYP2 |
| SPP1 | MET | FKBP10 | CAPN1 | POLR2K | SUPT4H1 | UBE2D3 | SOX5 |
| STMN1 | LSM5 | CITED2 | PAK2 | JUN | EZH2 | TPRKB | RPL18 |
| SULF1 | ASAP1 | RBFOX2 | MITF | S100A13 | RSU1 | PICALM | NSD1 |
| TGFBI | INSR | NFE2L1 | ARL3 | ANGPTL2 | CCDC88C | TNPO1 | SLC44A1 |
| THBS2 | SERPING1 | ATP2B1 | MKLN1 | MT-ATP8 | KDELC2 | CRISPLD2 | N4BP2L2 |
| TIMP2 | CMTM3 | PTPRM | GATAD2A | DNER | PBX3 | EIF4G2 | TM9SF2 |
| TMEM258 | OLFML2A | RPS11 | BBX | SSBP1 | RLF | POLR2A | RSPO2 |
| TMSB4X | SAMD4B | MAN2A1 | TCERG1 | NACA2 | EBPL | FILIP1L | XIST |
| TNC | MYO5A | HNRNPA2B1 | MORF4L2 | TWIST1 | TGFB3 | PABPC1 | CCNB1IP1 |
| TNFRSF11B | TTL | HSP90AA1 | DHFR | NAV1 | EGLN3 | FLNA | VASN |
| TOMM7 | UMAD1 | EPHA3 | PGK1 | RRBP1 | MCUB | TCEAL2 | POP5 |
| TPM4 | DPY30 | JMJD1C | TMEM184B | MT1F | LMO7 | FMNL2 | KIF20A |
| TPT1 | RNF7 | HES1 | CDK13 | TSC22D1 | C12orf57 | TTC37 | LTBP3 |
| UQCRB | PDGFA | SLC39A14 | ESD | CENPF | ANKRD50 | C1QTNF2 | COPS4 |
| VIM | C6orf48 | TUBB2B | CCDC90B | C14orf2 | EFHD1 | SKIL | FGF13 |
| WIF1 | SLC25A3 | CHD1 | LPGAT1 | ROCK2 | ACP1 | KMT2A | NPIPA1 |
| ZFP36 | SRPX | FBLN1 | SMURF2 | FOXP1 | IMP3 | ZCCHC14 | ARL6IP5 |
| ZFP36L1 | HNRNPUL2 | PTPN1 | CASP8AP2 | SEC11A | PDZD8 | OS9 | RNH1 |
| SPARC | ASH1L | HMGN3 | TNKS2 | SOX4 | PCLAF | ITM2B | SELENOF |
| AC112491.1 | YWHAB | PTEN | COL10A1 | ZFHX3 | UXT | PERP | GPR176 |
| HSPB8 | TCEAL8 | PSMA5 | MSX1 | DAB2 | CCNH | HNRNPC | UQCR10 |
| TNFAIP6 | TANC2 | PMAIP1 | RNF145 | PTTG1IP | ZEB1 | 2-Sep | NFE2L2 |
| MFAP5 | DPH3 | SMARCA2 | PTMA | GALNT15 | DUSP4 | HDGF | FRMD4B |
| LRRC75A | EEF1D | CDC42BPA | ATP10A | GOLIM4 | R3HDML | NDUFB5 | PPP2R5E |
| NBEAL1 | PUM1 | ARHGEF12 | PAX1 | SELENOK | TTC9 | THOC2 | ATP6V1B2 |
| ADAMTS1 | SH3GL1 | MAP1A | HIST1H2AC | FKBP5 | COX14 | TPST2 | PRPF8 |
| RPL6 | CHAC1 | KIRREL1 | ZFAND6 | PRRX1 | SLC29A1 | WISP1 | SARAF |
| SERPINE1 | MBNL1 | C1QTNF1 | CLSPN | RPL10 | CLIP1 | TSC22D3 | PDE1A |
| NDUFA1 | GJB2 | MMP19 | EIF4A3 | NPC2 | HCFC1 | PELI1 | AKT3 |
| GABARAPL2 | ZCRB1 | TMEM14B | COA1 | SSC5D | FDFT1 | ARHGAP5 | DBN1 |
| MAP4K4 | NUSAP1 | PRR11 | AL391056.1 | RPA3 | GPC4 | MAFF | DCAF10 |
| RPL13 | CD58 | SLC14A1 | CYTH3 | ANKRD12 | GSE1 | HIP1 | MTSS1L |
| MAN1A2 | RNF24 | MYADM | CKAP5 | ATP5L | ZNF367 | CEP55 | NCAM2 |
| KLF9 | EZR | RAB1A | GPR153 | DUSP1 | C16orf72 | NFAT5 | THBS4 |
| RPL12 | SLIT2 | TJP2 | RRM1 | ACTR2 | FBXO2 | FBLN5 | NRBF2 |
| MSMO1 | MYO9A | NTN1 | LRP11 | LGALS3BP | FOXA3 | USP47 | ATXN7 |
| RPS28 | KDM5A | TIMP4 | OAS3 | GTF2A2 | ANKRD17 | SFN | MAVS |
| RPL7A | TMEM14C | NFKBIZ | MAF | SON | PAFAH1B2 | SACS | SUN1 |
| PXDN | TMEM47 | NRP2 | COA4 | TNS1 | FUNDC1 | HLA-A | DIO2 |
| MAP1B | PLEKHB1 | HNRNPU | RETREG1 | AXL | ABL1 | SLC39A7 | SRGAP1 |
| 11-Sep | AC013394.1 | SELENOT | CPD | SPEN | BACE1 | SH3D19 | ABCF1 |
| INSIG1 | ANGPTL5 | PPDPF | TEX30 | S100A1 | TAC1 | ODC1 | BCL3 |
| HSPH1 | MSRB3 | OSBPL8 | AKAP11 | PTPN14 | PSMG2 | IER3IP1 | ZDHHC20 |
| ITGB5 | NCL | ARHGAP1 | ZHX3 | CDKN1A | HK1 | HDDC2 | AAK1 |
| MT-ATP6 | TLL1 | ADAMTS4 | COX7A1 | SYNPO | ALG13 | APC | TM9SF3 |
| MMP14 | ACKR3 | LDHA | YBX1 | SPCS1 | PRRC1 | MATN2 | COX6A1 |
| WISP2 | CCDC7 | CAPS | TNS3 | PRC1 | PPCS | SC5D | UBN1 |
| COX7A2 | CCNY | PSMA3 | HECTD1 | EDIL3 | RCC2 | PIEZO2 | XAF1 |
| EEF1B2 | TSPAN3 | CMKLR1 | ACTB | SEC31A | GPX7 | NTN4 | AMD1 |
| C1R | RERE | FZD8 | ZNF148 | FHL1 | PPP1R18 | THOC7 | BTBD7 |
| KIF5B | IRX3 | SSPN | UBR5 | ROCK1 | SMC6 | CPXM1 | ANGPT1 |
| TIMP3 | SEC14L1 | IER5 | OXCT1 | SEC11C | CSTB | NDUFB6 | TGFBR3 |
| HERPUD1 | PEAK1 | PLXDC1 | ETFRF1 | TPR | MYO1E | SDK2 | PIP4K2A |
| MYOF | CCNB1 | DDX5 | FZD10 | WNK1 | MAPK1 | CHST2 | MDN1 |
| NPM1 | NMRK1 | NIFK | ARHGAP35 | DPYSL3 | YAE1D1 | TBL1XR1 | NCAM1 |
| CDO1 | TMOD3 | ACTN1 | KAT6A | FNIP2 | UBE2C | UBL5 | POLR2G |
| RPL39 | SNED1 | BTG1 | INHBB | NDUFA4 | MEF2D | CD82 | MPC2 |
| MYH9 | ZNF706 | BAALC | TRIP13 | NAP1L1 | CDK14 | GREM1 | TMEM128 |
| DPYSL2 | SLC25A33 | NFIX | SPRY2 | LRRFIP1 | CHD3 | UTRN | FRMD8 |
| CDR1 | ARNTL2 | PPP3CA | IRS1 | CHI3L1 | ELK4 | HLA-B | ATP6V1E1 |
| RPS16 | PSAP | CEP350 | KATNAL1 | CAPZB | HS3ST1 | BAZ1B | POFUT1 |
| PFDN5 | DNAJC13 | PRDX3 | DVL3 | SH3PXD2B | PFKP | MTDH | COX4I1 |
| NBL1 | TMEM99 | NCOA3 | CTNNA1 | NORAD | PARVA | UFC1 | ALDH3B1 |
| DDR2 | GLI3 | PTPRG | COL16A1 | RGS5 | EIF5A | CKAP2 | EEF1E1 |
| CEMIP | CEP170 | EPS8 | MAOB | USMG5 | PCDH18 | ADAR | GRB10 |
| CLMP | MAP3K2 | HIPK2 | TMEM131 | RPL22 | RANBP2 | PLTP | POLR1D |
| APP | ARID5B | VCAM1 | GPAT3 | B4GALT1 | AFF1 | PRRC2B | ATP5G1 |
| RSL24D1 | MIA3 | COX7A2L | NCOR1 | HIVEP2 | LINC00545 | ASAH1 | ANP32E |
| GPX3 | PBRM1 | NFIL3 | WASL | EPYC | GAPDH | LEPR | MAP7D3 |
| EMP1 | YAP1 | GLG1 | TIMM10 | PIM1 | NRIP1 | DSG2 | ACTN4 |
| DEFB1 | TBC1D5 | EIF4G1 | PHYH | ELN | ATAD2 | TFPI2 | RYBP |
| S100A2 | MAGED1 | HOOK3 | PLA2G4A | ENPP1 | CDON | GCH1 | LACTB2 |
| CTGF | GALNT5 | PFN1 | CSF1 | H2AFZ | ATRX | CFL1 | PTHLH |
| NFIC | FAM102B | ITGA6 | SH3RF3 | A2M | SLAIN2 | ATP5G2 | RPS14 |
| HSPA6 | SCOC | EIF3I | WIPF2 | NSA2 | UGGT1 | CSPG4 | AC010422.3 |
| TSPAN6 | FKBP1A | SRP14 | LRRC58 | NRN1 | MYC | SMC3 | MMP7 |
| BGN | PTGFRN | CCDC80 | ORM1 | TM4SF1 | EEF2 | NNMT | SMAD5 |
| TPPP3 | RERG | TMED10 | VPS29 | FTL | ERLIN1 | ST13 | CREB3L2 |
| KLF6 | SAMHD1 | BIRC5 | MCAM | RPL14 | RSF1 | VKORC1 | NPNT |
| CDK6 | SETD2 | GLO1 | REST | RPL36 | GABARAPL1 | GEM | KDM5B |
| CALM2 | METTL5 | CANX | NLGN2 | IL6ST | GTF3C4 | GAS7 | GPR107 |
| SFRP2 | TMCO3 | UBA52 | BRPF3 | COLEC12 | ATP13A3 | LASP1 | SLC20A1 |
| CTHRC1 | EDEM3 | DIAPH3 | SGK1 | NDUFS5 | IL11 | FKBP9 | FAM20B |
| CTSB | COPZ1 | UBB | CDH2 | MKI67 | 9-Sep | CKAP2L | UBE2V2 |
| SPINT2 | FEM1B | MIB1 | DMAC1 | EML1 | DDX46 | RHEB | STAU1 |
| ID3 | SLC5A3 | SCARA5 | XPO1 | GNB4 | SUMO2 | MYOT | IRF2BPL |
| SKP1 | NUP50 | BMP2 | HRH1 | MXRA8 | TNKS1BP1 | CHMP2B | RUNX1 |
| SPARCL1 | HP1BP3 | CHAD | MIR99AHG | PNP | SNRPN | OCIAD1 | CPEB2 |
| ITGA5 | PPFIA1 | PRDX6 | HSPA5 | OSTC | CAMKK2 | CSDE1 | PITPNB |
| SH3PXD2A | KDM6B | RGS16 | RPS15 | CD55 | KIAA1217 | ADD1 | SELENON |
| RPS7 | PIMREG | CCDC71L | ANXA2 | WASF2 | KBTBD2 | RFTN1 | RBM3 |
| TOP2A | SPTSSB | MCMDC2 | TREM1 | TEAD1 | CMSS1 | GSTM5 | VGLL3 |
| SPTBN1 | RGS10 | GPR183 | ME1 | CYSTM1 | EPB41L3 | GLRX2 | GCN1 |
| ADAMTS5 | KIF4A | SRRM2 | AC025048.4 | LOXL1 | RXRA | C11orf1 | RPL3 |
| SUB1 | DPP4 | CHRDL2 | BUB1 | SPTAN1 | ROBO1 | LDHB | BCKDHB |
| MT-ND3 | BCL2A1 | RPS27L | ARFGEF2 | MED13L | CCDC85B | TVP23B | PSMD10 |
| BEX3 | SMC2 | ELOC | JKAMP | S1PR3 | FGF7 | PENK | TFPI |
| ATP2B4 | MDK | PKD2 | PLBD2 | BNC2 | AC092958.1 | SETD5 | VDAC2 |
| ELK3 | KIF5C | PPIA | MEOX2 | PIK3R1 | HSP90AB1 | RPLP0 | FGF14-AS2 |
| MARCKS | SVIL | BCLAF1 | C1orf21 | FAM180A | SNTB2 | RIN2 | ATP5C1 |
| CAV1 | VAPA | PLK2 | TRAK1 | C1QTNF3 | TNFRSF19 | ATP5G3 | NR2F2 |
| PSD3 | LATS2 | KMT2C | STAT3 | BRD2 | STAT2 | MAP7D1 | TMED2 |
| RPL36AL | WDR61 | CYTOR | ATP5I | NT5E | NR1D2 | SERTAD1 | C7 |
| RPL23A | MRPL21 | CCDC59 | ATP6V0E1 | ID2 | PTRH2 | LPP | LINC00882 |
| ATP2A2 | COX7B | MMP11 | TJP1 | SCARA3 | SPIN1 | PPP1R12A | ACAP2 |
| CPE | ATPIF1 | NIPBL | BCCIP | ATL3 | SMG1 | RHOB | CD151 |
| SRSF5 | ASNS | DYNLL1 | TAF7 | RBBP6 | CD63 | RPS19 | CTSD |
| LOX | ZBTB2 | HMMR | PFDN4 | RBM25 | SETD7 | MRC2 | DLGAP5 |

Table S3

| ID | setSize | enrichmentScore | NES | pvalue | p.adjust | qvalue | rank |
| --- | --- | --- | --- | --- | --- | --- | --- |
| hsa03008_Ribosome_biogenesis_in_eukaryotes | 71 | -0.61312 | -2.81874 | 1.00E-10 | 1.39E-08 | 7.88E-09 | 4342 |
| hsa03010_Ribosome | 83 | -0.56402 | -2.69642 | 1.00E-10 | 1.39E-08 | 7.88E-09 | 4356 |
| hsa04080_Neuroactive_ligand-receptor_interaction | 352 | 0.37247 | 1.992442 | 1.22E-10 | 1.39E-08 | 7.88E-09 | 5957 |
| hsa03040_Spliceosome | 123 | -0.47175 | -2.40675 | 2.74E-10 | 2.35E-08 | 1.32E-08 | 5521 |
| hsa00970_Aminoacyl-tRNA_biosynthesis | 44 | -0.64456 | -2.66943 | 2.04E-09 | 1.40E-07 | 7.92E-08 | 2737 |
| hsa04151_PI3K-Akt_signaling_pathway | 339 | 0.3438 | 1.841151 | 7.10E-08 | 4.06E-06 | 2.29E-06 | 4968 |
| hsa04740_Olfactory_transduction | 115 | 0.447876 | 2.086477 | 3.72E-07 | 1.79E-05 | 1.01E-05 | 3497 |
| hsa04060_Cytokine-cytokine_receptor_interaction | 274 | 0.358854 | 1.869163 | 4.18E-07 | 1.79E-05 | 1.01E-05 | 5196 |
| hsa05410_Hypertrophic_cardiomyopathy | 97 | 0.462717 | 2.107742 | 9.02E-07 | 3.44E-05 | 1.94E-05 | 3575 |
| hsa03013_Nucleocytoplasmic_transport | 97 | -0.43546 | -2.12004 | 1.16E-06 | 3.98E-05 | 2.25E-05 | 4276 |
| hsa05144_Malaria | 46 | 0.561526 | 2.22076 | 2.46E-06 | 6.54E-05 | 3.69E-05 | 2707 |
| hsa04640_Hematopoietic_cell_lineage | 88 | 0.475406 | 2.114961 | 2.37E-06 | 6.54E-05 | 3.69E-05 | 2447 |
| hsa05414_Dilated_cardiomyopathy | 102 | 0.447876 | 2.051125 | 2.48E-06 | 6.54E-05 | 3.69E-05 | 3575 |
| hsa03050_Proteasome | 42 | -0.54809 | -2.25918 | 5.60E-06 | 0.000129 | 7.30E-05 | 5014 |
| hsa05320_Autoimmune_thyroid_disease | 43 | 0.569551 | 2.198031 | 5.66E-06 | 0.000129 | 7.30E-05 | 3489 |
| hsa03015_mRNA_surveillance_pathway | 85 | -0.42626 | -2.02995 | 1.01E-05 | 0.000217 | 0.000123 | 2795 |
| hsa05163_Human_cytomegalovirus_infection | 210 | 0.349186 | 1.757406 | 1.15E-05 | 0.000231 | 0.000131 | 5534 |
| hsa04514_Cell_adhesion_molecules | 144 | 0.388275 | 1.862258 | 1.23E-05 | 0.000234 | 0.000132 | 5276 |
| hsa05014_Amyotrophic_lateral_sclerosis | 323 | -0.27649 | -1.61411 | 1.93E-05 | 0.000348 | 0.000197 | 5573 |
| hsa05165_Human_papillomavirus_infection | 315 | 0.310969 | 1.651345 | 3.30E-05 | 0.000566 | 0.00032 | 5578 |
| hsa03022_Basal_transcription_factors | 38 | -0.52369 | -2.0847 | 3.74E-05 | 0.000584 | 0.00033 | 3339 |
| hsa04062_Chemokine_signaling_pathway | 178 | 0.356294 | 1.75976 | 3.59E-05 | 0.000584 | 0.00033 | 5797 |
| hsa04725_Cholinergic_synapse | 108 | 0.3999 | 1.839905 | 4.71E-05 | 0.000703 | 0.000397 | 4537 |
| hsa04061_Viral_protein_interaction_with_cytokine_and_cytokine_receptor | 91 | 0.42335 | 1.89883 | 5.07E-05 | 0.000725 | 0.000409 | 6246 |
| hsa05202_Transcriptional_misregulation_in_cancer | 174 | 0.35594 | 1.755839 | 5.38E-05 | 0.000738 | 0.000417 | 4921 |
| hsa04668_TNF_signaling_pathway | 115 | 0.392328 | 1.8277 | 5.78E-05 | 0.000763 | 0.000431 | 5991 |
| hsa05032_Morphine_addiction | 90 | 0.416806 | 1.865434 | 6.63E-05 | 0.000784 | 0.000443 | 5471 |
| hsa04630_JAK-STAT_signaling_pathway | 157 | 0.364216 | 1.769184 | 6.42E-05 | 0.000784 | 0.000443 | 4897 |
| hsa05012_Parkinson_disease | 235 | -0.29029 | -1.65272 | 6.60E-05 | 0.000784 | 0.000443 | 5400 |
| hsa00785_Lipoic_acid_metabolism | 17 | -0.68531 | -2.21287 | 7.29E-05 | 0.000833 | 0.00047 | 1003 |
| hsa03430_Mismatch_repair | 22 | -0.63733 | -2.23294 | 8.00E-05 | 0.000885 | 0.0005 | 3688 |
| hsa04650_Natural_killer_cell_mediated_cytotoxicity | 112 | 0.394333 | 1.833276 | 8.97E-05 | 0.000961 | 0.000543 | 3186 |
| hsa04380_Osteoclast_differentiation | 127 | 0.37612 | 1.773546 | 0.0001 | 0.001043 | 0.000589 | 5412 |
| hsa04512_ECM-receptor_interaction | 85 | 0.425178 | 1.880933 | 0.00011 | 0.001113 | 0.000628 | 5504 |
| hsa04726_Serotonergic_synapse | 103 | 0.393862 | 1.801882 | 0.000131 | 0.001283 | 0.000725 | 4537 |
| hsa00020_Citrate_cycle_(TCA_cycle) | 28 | -0.56124 | -2.07238 | 0.000142 | 0.001356 | 0.000766 | 4620 |
| hsa05146_Amoebiasis | 98 | 0.393493 | 1.792002 | 0.000147 | 0.001362 | 0.000769 | 5020 |
| hsa04010_MAPK_signaling_pathway | 286 | 0.299795 | 1.574031 | 0.00024 | 0.002167 | 0.001224 | 5097 |
| hsa04727_GABAergic_synapse | 88 | 0.415378 | 1.847914 | 0.000264 | 0.002326 | 0.001313 | 5961 |
| hsa04621_NOD-like_receptor_signaling_pathway | 166 | 0.344343 | 1.686287 | 0.000277 | 0.002374 | 0.001341 | 5097 |
| hsa03420_Nucleotide_excision_repair | 54 | -0.44061 | -1.93439 | 0.000291 | 0.002431 | 0.001373 | 3181 |
| hsa04020_Calcium_signaling_pathway | 247 | 0.302869 | 1.56144 | 0.000298 | 0.002432 | 0.001373 | 4999 |
| hsa04064_NF-kappa_B_signaling_pathway | 99 | 0.385563 | 1.749192 | 0.00031 | 0.002476 | 0.001398 | 3655 |
| hsa05219_Bladder_cancer | 41 | 0.509067 | 1.951579 | 0.000394 | 0.003071 | 0.001734 | 2954 |
| hsa05412_Arrhythmogenic_right_ventricular_cardiomyopathy | 84 | 0.404096 | 1.778181 | 0.000423 | 0.003222 | 0.00182 | 4845 |
| hsa05215_Prostate_cancer | 95 | 0.384734 | 1.739946 | 0.000522 | 0.003892 | 0.002198 | 5820 |
| hsa04015_Rap1_signaling_pathway | 203 | 0.315947 | 1.586168 | 0.000545 | 0.003981 | 0.002248 | 5155 |
| hsa00563_Glycosylphosphatidylinositol_(GPI)-anchor_biosynthesis | 26 | -0.56041 | -2.06416 | 0.00069 | 0.00473 | 0.002671 | 3162 |
| hsa03030_DNA_replication | 36 | -0.49674 | -1.97145 | 0.000664 | 0.00473 | 0.002671 | 3531 |
| hsa04260_Cardiac_muscle_contraction | 78 | 0.402895 | 1.752484 | 0.000684 | 0.00473 | 0.002671 | 3580 |
| hsa00900_Terpenoid_backbone_biosynthesis | 20 | -0.58508 | -1.98038 | 0.000792 | 0.005327 | 0.003008 | 3690 |
| hsa05323_Rheumatoid_arthritis | 84 | 0.391575 | 1.723084 | 0.000921 | 0.005947 | 0.003358 | 4882 |
| hsa04928_Parathyroid_hormone_synthesis,_secretion_and_action | 112 | 0.358193 | 1.665259 | 0.000936 | 0.005947 | 0.003358 | 5138 |
| hsa04926_Relaxin_signaling_pathway | 125 | 0.351046 | 1.660999 | 0.000922 | 0.005947 | 0.003358 | 4537 |
| hsa05417_Lipid_and_atherosclerosis | 201 | 0.313354 | 1.570053 | 0.001055 | 0.006579 | 0.003715 | 5534 |
| hsa04929_GnRH_secretion | 63 | 0.426717 | 1.780038 | 0.00116 | 0.007108 | 0.004013 | 4609 |
| hsa04360_Axon_guidance | 178 | 0.315537 | 1.558461 | 0.001215 | 0.007312 | 0.004129 | 3987 |
| hsa03018_RNA_degradation | 75 | -0.36271 | -1.68138 | 0.001297 | 0.00754 | 0.004257 | 4569 |
| hsa04510_Focal_adhesion | 197 | 0.307722 | 1.54266 | 0.001285 | 0.00754 | 0.004257 | 6028 |
| hsa03410_Base_excision_repair | 42 | -0.446 | -1.83834 | 0.001564 | 0.008797 | 0.004968 | 3030 |
| hsa05206_MicroRNAs_in_cancer | 158 | 0.323681 | 1.571514 | 0.001565 | 0.008797 | 0.004968 | 3494 |
| hsa01522_Endocrine_resistance | 94 | 0.369774 | 1.670465 | 0.001676 | 0.009168 | 0.005177 | 3462 |
| hsa04724_Glutamatergic_synapse | 110 | 0.353951 | 1.64159 | 0.001684 | 0.009168 | 0.005177 | 3228 |
| hsa04130_SNARE_interactions_in_vesicular_transport | 33 | -0.48944 | -1.89269 | 0.001711 | 0.009171 | 0.005179 | 3566 |
| hsa05160_Hepatitis_C | 144 | 0.329573 | 1.580709 | 0.00187 | 0.009718 | 0.005488 | 3295 |
| hsa04072_Phospholipase_D_signaling_pathway | 142 | 0.329721 | 1.577275 | 0.001864 | 0.009718 | 0.005488 | 5689 |
| hsa05017_Spinocerebellar_ataxia | 136 | -0.29836 | -1.56393 | 0.002048 | 0.010485 | 0.005921 | 4868 |
| hsa05164_Influenza_A | 150 | 0.32965 | 1.589794 | 0.002143 | 0.010653 | 0.006015 | 3295 |
| hsa05207_Chemical_carcinogenesis | 176 | 0.317008 | 1.567173 | 0.002128 | 0.010653 | 0.006015 | 5677 |
| hsa04970_Salivary_secretion | 84 | 0.371268 | 1.633726 | 0.002741 | 0.013388 | 0.00756 | 3497 |
| hsa05167_Kaposi_sarcoma-associated_herpesvirus_infection | 183 | 0.301368 | 1.493668 | 0.002771 | 0.013388 | 0.00756 | 3497 |
| hsa05033_Nicotine_addiction | 39 | 0.469166 | 1.779453 | 0.003214 | 0.015311 | 0.008646 | 5937 |
| hsa05166_Human_T-cell_leukemia_virus_1_infection | 209 | 0.293861 | 1.476247 | 0.003379 | 0.015876 | 0.008965 | 3506 |
| hsa05161_Hepatitis_B | 153 | 0.318443 | 1.540916 | 0.003541 | 0.016415 | 0.009269 | 6786 |
| hsa04620_Toll-like_receptor_signaling_pathway | 96 | 0.343698 | 1.560194 | 0.003607 | 0.016496 | 0.009315 | 5534 |
| hsa04672_Intestinal_immune_network_for_IgA_production | 42 | 0.449002 | 1.725777 | 0.003947 | 0.017813 | 0.010059 | 3633 |
| hsa04625_C-type_lectin_receptor_signaling_pathway | 102 | 0.345016 | 1.580059 | 0.004124 | 0.018372 | 0.010374 | 3497 |
| hsa04066_HIF-1_signaling_pathway | 105 | 0.343151 | 1.574887 | 0.004573 | 0.020108 | 0.011354 | 5534 |
| hsa00062_Fatty_acid_elongation | 22 | -0.52202 | -1.82894 | 0.004711 | 0.020454 | 0.01155 | 5860 |
| hsa04913_Ovarian_steroidogenesis | 44 | 0.436191 | 1.698044 | 0.004834 | 0.020562 | 0.011611 | 4586 |
| hsa04934_Cushing_syndrome | 150 | 0.315293 | 1.520554 | 0.004856 | 0.020562 | 0.011611 | 5455 |
| hsa04261_Adrenergic_signaling_in_cardiomyocytes | 149 | 0.313026 | 1.50806 | 0.005224 | 0.02159 | 0.012191 | 4332 |
| hsa05162_Measles | 130 | 0.319439 | 1.505458 | 0.005174 | 0.02159 | 0.012191 | 3295 |
| hsa05340_Primary_immunodeficiency | 35 | 0.45914 | 1.692953 | 0.005446 | 0.021978 | 0.01241 | 5034 |
| hsa04974_Protein_digestion_and_absorption | 94 | 0.342819 | 1.548691 | 0.005408 | 0.021978 | 0.01241 | 4129 |
| hsa04659_Th17_cell_differentiation | 103 | 0.337149 | 1.542423 | 0.005661 | 0.022576 | 0.012748 | 4036 |
| hsa04146_Peroxisome | 80 | -0.33387 | -1.57756 | 0.006033 | 0.023514 | 0.013278 | 3532 |
| hsa04721_Synaptic_vesicle_cycle | 77 | 0.360707 | 1.566965 | 0.006018 | 0.023514 | 0.013278 | 4134 |
| hsa03440_Homologous_recombination | 41 | -0.4133 | -1.68327 | 0.006239 | 0.024045 | 0.013578 | 3910 |
| hsa04927_Cortisol_synthesis_and_secretion | 63 | 0.38377 | 1.600886 | 0.006379 | 0.02431 | 0.013727 | 3150 |
| hsa04024_cAMP_signaling_pathway | 219 | 0.283817 | 1.439159 | 0.006574 | 0.024779 | 0.013992 | 5830 |
| hsa00980_Metabolism_of_xenobiotics_by_cytochrome_P450 | 53 | 0.400884 | 1.619749 | 0.006718 | 0.024861 | 0.014039 | 6239 |
| hsa05235_PD-L1_expression_and_PD-1_checkpoint_pathway_in_cancer | 86 | 0.351585 | 1.556991 | 0.006741 | 0.024861 | 0.014039 | 2272 |
| hsa04623_Cytosolic_DNA-sensing_pathway | 74 | 0.369812 | 1.600234 | 0.00701 | 0.025312 | 0.014293 | 3743 |
| hsa04933_AGE-RAGE_signaling_pathway_in_diabetic_complications | 99 | 0.336121 | 1.524887 | 0.00696 | 0.025312 | 0.014293 | 4363 |
| hsa04742_Taste_transduction | 74 | 0.369678 | 1.599656 | 0.007238 | 0.025596 | 0.014453 | 5083 |
| hsa04371_Apelin_signaling_pathway | 133 | 0.308215 | 1.46025 | 0.007166 | 0.025596 | 0.014453 | 3497 |
| hsa03020_RNA_polymerase | 31 | -0.45219 | -1.71805 | 0.007437 | 0.026031 | 0.014699 | 4869 |
| hsa05169_Epstein-Barr_virus_infection | 187 | 0.289574 | 1.442066 | 0.007854 | 0.027212 | 0.015366 | 3295 |
| hsa04973_Carbohydrate_digestion_and_absorption | 41 | 0.434094 | 1.664163 | 0.008553 | 0.029335 | 0.016565 | 5534 |
| hsa04120_Ubiquitin_mediated_proteolysis | 136 | -0.27487 | -1.4408 | 0.009625 | 0.032686 | 0.018457 | 4411 |
| hsa04921_Oxytocin_signaling_pathway | 148 | 0.302359 | 1.45271 | 0.00987 | 0.033189 | 0.018741 | 3776 |
| hsa04660_T_cell_receptor_signaling_pathway | 117 | 0.30827 | 1.437444 | 0.010351 | 0.03447 | 0.019464 | 3295 |
| hsa01200_Carbon_metabolism | 108 | -0.28589 | -1.44165 | 0.010574 | 0.034874 | 0.019692 | 4091 |
| hsa05142_Chagas_disease | 97 | 0.331514 | 1.510094 | 0.010707 | 0.034975 | 0.019749 | 5392 |
| hsa01250_Biosynthesis_of_nucleotide_sugars | 37 | -0.41056 | -1.6305 | 0.011105 | 0.035936 | 0.020292 | 5736 |
| hsa04961_Endocrine_and_other_factor-regulated_calcium_reabsorption | 51 | 0.401675 | 1.608744 | 0.01142 | 0.036607 | 0.020671 | 4052 |
| hsa04014_Ras_signaling_pathway | 221 | 0.269783 | 1.369348 | 0.012105 | 0.038445 | 0.021709 | 4966 |
| hsa04670_Leukocyte_transendothelial_migration | 106 | 0.323817 | 1.484928 | 0.012525 | 0.039413 | 0.022256 | 5155 |
| hsa04925_Aldosterone_synthesis_and_secretion | 96 | 0.322188 | 1.46255 | 0.012735 | 0.03971 | 0.022423 | 3497 |
| hsa05214_Glioma | 74 | 0.355375 | 1.537763 | 0.012945 | 0.04 | 0.022587 | 3497 |
| hsa05224_Breast_cancer | 143 | 0.289552 | 1.383934 | 0.013692 | 0.041931 | 0.023678 | 5756 |
| hsa00190_Oxidative_phosphorylation | 111 | -0.2816 | -1.42027 | 0.013998 | 0.042488 | 0.023992 | 4139 |
| hsa04916_Melanogenesis | 98 | 0.321051 | 1.462092 | 0.014232 | 0.042821 | 0.02418 | 5818 |
| hsa05150_Staphylococcus_aureus_infection | 72 | 0.348069 | 1.495133 | 0.014984 | 0.044691 | 0.025236 | 3489 |
| hsa00590_Arachidonic_acid_metabolism | 54 | 0.381886 | 1.544249 | 0.015629 | 0.045914 | 0.025927 | 4892 |
| hsa05225_Hepatocellular_carcinoma | 155 | 0.286961 | 1.389292 | 0.015662 | 0.045914 | 0.025927 | 5756 |
| hsa05330_Allograft_rejection | 33 | 0.43284 | 1.572531 | 0.015903 | 0.046227 | 0.026103 | 3489 |
| hsa00430_Taurine_and_hypotaurine_metabolism | 14 | 0.568107 | 1.628473 | 0.017213 | 0.049613 | 0.028015 | 989 |
| hsa04658_Th1_and_Th2_cell_differentiation | 87 | 0.335018 | 1.488223 | 0.017431 | 0.049642 | 0.028032 | 3506 |
| hsa04976_Bile_secretion | 75 | 0.339388 | 1.468729 | 0.017512 | 0.049642 | 0.028032 | 4472 |

Table S4

| GATA6-AS1 | SESN3 | DSG3 | PLEC | H19 | GPX3 | COLGALT1 | ZBED5-AS1 |
| --- | --- | --- | --- | --- | --- | --- | --- |
| SLC9A3-AS1 | CFAP54 | DSP | PLP2 | NKIRAS1 | FLVCR1 | TMC7 | UBE2D1 |
| ICA1-AS1 | ZNF420 | ABCA1 | PMP2 | ANK2 | NTMT1 | TUSC3 | VASP |
| LINC01503 | CTSO | TUBB | RIPPLY3 | MCTS1 | GRIN2A | NETO2 | EZR |
| TNIP1 | CUX1 | FDFT1 | RIN2 | GUSB | GTPBP8 | CBR3 | XDH |
| BTN3A3 | FAM218A | FDPS | RHOF | H1-0 | LGALSL | KALRN | ZNF124 |
| SYNCRIP | AMOT | RAP1GAP2 | APBB1IP | IGFBP7 | GSTA4 | BTAF1 | ZFAND5 |
| IFI44 | PRAG1 | EPB41L3 | SYTL2 | ITPR3 | FAM216A | DTD1 | SECISBP2 |
| BTN3A2 | CYP19A1 | RNF144B | PPL | LAMB2 | DSE | GCNA | TRPM8 |
| BTN3A1 | DGKA | ZNF385A | RADX | LOXL2 | PKN3 | FADS2 | CRELD2 |
| PRIMA1 | DGKG | MOXD1 | MTPAP | MELTF | SLC40A1 | PIGL | SH3TC2 |
| ZNF540 | CIMAP1C | ZNF337 | EVA1B | MXRA7 | H2AC8 | RNF14 | C1orf115 |
| LPAR1 | DENND1B | NARF | PPP2R2B | NDUFV1 | HBE1 | SAFB2 | SUGCT |
| EIF2S1 | DAW1 | SRPX2 | TRAPPC14 | PCOLCE | HLA-DQB1 | LIPT2-AS1 | SETD6 |
| ZNF585A | CFD | FAM177A1 | TMEM140 | SLC22A17 | HYAL1 | SMIM31 | DNAJC22 |
| AMFR | DSC2 | ANXA2P2 | HES6 | TDP2 | GLDN | MSANTD2-AS1 | CCDC15 |
| ANK3 | AGT | ANXA11 | ANKRD10 | ASPN | FAS | COPB2-DT | ARMC9 |
| IFIT2 | ECM1 | HLA-F | BEX1 | CHMP1B | IL12RB2 | CLEC3A | CFAP43 |
| IFIT1 | EGF | HLA-G | SERTAD4 | CFB | INHBA | RCL1 | WDR26 |
| IFIT3 | ZNF367 | HMGCR | METTL3 | CLEC11A | INPP5A | LHFPL2 | CUBN |
| ZFHX3 | AMN1 | HMGCS1 | RELN | BGN | INSR | DHRS2 | ULBP2 |
| NHS | SMIM14 | HPRT1 | MAP3K7CL | UPF3B | JAK1 | CDO1 | SLC19A3 |
| CRLS1 | SLC29A1 | MMAB | PAK6 | TGFBI | TEX9 | CPQ | ITIH5 |
| ARHGAP17 | EPHX2 | IDI1 | GPR108 | TPP2 | TMEM205 | OLFM1 | ITM2C |
| RSAD1 | F8 | INSIG1 | PRTFDC1 | TUBA4A | KCTD4 | CEBPD | CAMK2G |
| RAB22A | ENKUR | KCNMA1 | ANKMY2 | UBE2E1 | CAPN8 | IFITM2 | H2BC8 |
| PLAAT4 | RSPH9 | ACAT2 | ATP10A | CA9 | ZNF662 | PRELID3A | H4C8 |
| AEN | VWDE | LDLR | ATP10D | HSPBAP1 | LAG3 | AVIL | CASP4 |
| CRELD1 | JAZF1 | FADS1 | SERTAD4-AS1 | STAM | LAMB3 | VAMP5 | RSPH3 |
| DCAF10 | THSD7A | VLDLR-AS1 | PCDH19 | SSPN | LCP1 | LYVE1 | ARB2A |
| GUCD1 | FGF1 | CD46 | PCDH10 | CRISPLD2 | ABLIM1 | JTB | BCAR3 |
| SELENOI | ZNF365 | MIR570HG | PTPRZ1 | PGBD1 | LMO2 | MTMR11 | CCDC77 |
| OASL | PTGR1 | MVD | RB1 | CILP | LY75 | SMPDL3A | MCRIP2 |
| ISG15 | FOXF2 | MYO5B | RGS3 | RSPO3 | TM4SF1 | TMSB15A | MAP3K21 |
| LPGAT1 | NFASC | NME3 | RHCE | DGKD | EPCAM | RBPMS | B3GNT9 |
| C8orf88 | ZCCHC14 | ATL1 | RPN1 | CIPC | MAN1A1 | CNMD | ARHGAP5-AS1 |
| DNAJB6 | KANK1 | CYB5R2 | CLIP1 | BHLHE40 | MCM2 | DEPP1 | ZNRF1 |
| CGREF1 | DDHD2 | SERPINA1 | S100A3 | SNAP23 | MAP3K5 | SPACA9 | C1orf94 |
| FSTL1 | ADGRL2 | GDAP1 | S100A10 | SAP30 | MGAT1 | PRSS23 | SMIM3 |
| C1QTNF3 | FMO4 | DNAJC25 | BFSP1 | INPP4B | LINC02709 | EMILIN1 | ENC1 |
| CHCHD1 | ABCB9 | MCUB | GALNT11 | CCN6 | MX1 | ANKRD13C-DT | RUNX1T1 |
| PLIN2 | CARHSP1 | FAIM | CLSTN2 | MCFD2 | MYBL1 | PRAF2 | CBLB |
| TMEM170A | ORC6 | ZNF331 | SMIM5 | DLG5 | ATP1B1 | GLB1L3 | CFLAR |
| RPTN | SERHL2 | SYBU | HHIP | GSTO1 | CCN3 | MGLL | CCNB1 |
| COL2A1 | TCP11L2 | CDC42SE1 | SUDS3 | ADAMTS2 | ATP2B4 | MCM3AP-AS1 | RAB29 |
| DRAM2 | CHRDL2 | BDH2 | BLVRB | ADGRE5 | CHAC2 | MAL2 | RSPH1 |
| TBC1D20 | PLEKHG4 | THAP11 | SMYD3 | RB1CC1 | OCA2 | C1QTNF4 | SELENBP1 |
| COL5A1 | RCHY1 | TXNDC16 | SLC7A2 | MRC2 | OGDH | DDIT4L | EMILIN3 |
| COL9A3 | TMEM158 | PTMS | SNHG20 | G3BP2 | CLDN11 | TENT5B | MSANTD3 |
| SLC31A2 | SZRD1 | ZBTB4 | CENPBD2P | LINC02035 | PAFAH1B3 | WDR17 | RCSD1 |
| MAPK14 | GAS2 | CXCL16 | SNTB1 | ERVMER34-1 | SERPINB2 | TRIM6 | CD9 |
| CITED4 | NAP1L5 | SQOR | SOAT1 | LINC00673 | PAX1 | WHAMM | DMKN |
| AEBP1 | GHR | S100A2 | SOX4 | TXNIP | ASAP1 | CYB5D2 | TRMT10A |
| CYB5R3 | USP21 | MSMO1 | DST | EBP | TBX22 | INO80C | ENTREP1 |
| A2M | C5AR2 | SC5D | ELOVL4 | ERG28 | SERPINA5 | SLC44A3 | CHST10 |
| STX2 | ERLEC1 | SCD | STXBP1 | COX20 | NMD3 | COL6A1 | PIGB |
| CNOT1 | GLRX | ST6GAL1 | TBXT | FBLN7 | CRYL1 | COL9A2 | ENTPD4 |
| ATG2A | SFN | BMP6 | ADAM17 | CTSV | PHF11 | COL11A2 | PDIA4 |
| FMOD | ANG | SQLE | TCEA3 | CYP51A1 | PLCE1 | SLC66A3 | WSCD2 |
| HEBP2 | SLC25A45 | SREBF2 | ACTC1 | DHCR7 | PDK4 | LRRC15 | MTSS1 |
| PLD3 | NUDT7 | TGM2 | TFPI | DHCR24 | TPPP3 | AASDH | TRIL |
| MXRA5 | GPR19 | YWHAH | TIAM1 | AGA | ENPP2 | TMEM71 | HS3ST1 |
| BLOC1S1 | ZFP82 | PANK3 | TIMP4 | RCAN1 | RAB23 | RALYL | CDC34 |
| TNFRSF21 | SH3PXD2B | ZNF329 | GPR137B | DSG2 | PIGC | CRAT | FGFBP1 |

Table S5

| AARS1 | MARS2 | F2 | PTGER2 | CDH15 | OR4N4 | ICAM1 | SPG11 |
| --- | --- | --- | --- | --- | --- | --- | --- |
| ABCA1 | MAS1 | FARP2 | PTGER3 | CDH5 | OR51B4 | ICMT | SPHK1 |
| ABL1 | MATR3 | FARS2 | PTGER4 | CDK14 | OR51I1 | ICOS | SPI1 |
| ACAT1 | MC1R | FARSB | PTH1R | CDK7 | OR51M1 | ICOSLG | SPN |
| ACAT2 | MC3R | FASLG | PTH2 | CDKN1A | OR5I1 | ID2 | SPX |
| ACE | MCHR1 | FBL | PTK2 | CDKN1B | OR5L2 | IDH1 | SRC |
| ACHE | MCHR2 | FCER1G | PTPN6 | CDKN2C | OR5P2 | IDH3A | SRD5A2 |
| ACKR1 | MCL1 | FCER2 | PTPRC | CEBPA | OR5V1 | IDI1 | SRGAP2 |
| ACKR3 | MCM2 | FCGR2B | PTPRM | CEBPB | OR6A2 | IFI16 | SRSF1 |
| ACLY | MCM3 | FCGR3B | PUF60 | CETN2 | OR6B1 | IFNA1 | SRSF3 |
| ACP5 | MCM4 | FDPS | PYCARD | CFLAR | OR7A17 | IFNA2 | SRSF5 |
| ACTA2 | MCM5 | FEN1 | PYM1 | CGA | OR7A5 | IFNA21 | SRSF6 |
| ACTN3 | MCM6 | FEV | QRFPR | CGAS | OR7C1 | IFNA5 | SRSF7 |
| ACTR10 | MCM7 | FGF18 | RAB1A | CHAD | OR8B8 | IFNA6 | SRSF8 |
| ACVR2A | MCU | FGF22 | RAB39B | CHAT | ORAI2 | IFNA8 | SRSF9 |
| ACVRL1 | MDH1 | FGF6 | RAB5A | CHMP2B | OSM | IFNAR2 | SSBP1 |
| ADCY1 | MDH2 | FGF9 | RAB5B | CHRM1 | OXTR | IFNB1 | SSH1 |
| ADCY4 | MECOM | FGR | RAB7A | CHRM3 | P2RX1 | IFNE | SSH3 |
| ADCY8 | MEF2A | FH | RAB8A | CHRM4 | P2RX2 | IFNG | SST |
| ADCY9 | MEF2D | FIG4 | RAC1 | CHRNA2 | P2RX3 | IFNK | SSU72 |
| ADCYAP1 | MEFV | FIP1L1 | RAC2 | CHRNA3 | P2RX5 | IFNL1 | STAT2 |
| ADORA1 | MEN1 | FLNA | RAC3 | CHRNA4 | P2RX6 | IFNL2 | STAT6 |
| ADORA2A | MEPE | FLT3LG | RAD23B | CHRNA9 | P2RX7 | IGF1 | STING1 |
| ADRA1B | MFN1 | FLT4 | RAE1 | CHRNB1 | P2RY10 | IGF1R | STK11 |
| ADRA1D | MFN2 | FN1 | RAF1 | CHRNB2 | P2RY14 | IGFBP3 | STK3 |
| ADRA2A | MFNG | FOSB | RANBP2 | CHRNB3 | P2RY4 | IL17A | SUCLA2 |
| ADRB3 | MIB2 | FOSL1 | RAP1A | CHRNB4 | P2RY8 | IL17RC | SUCLG1 |
| AFG2A | MITF | FOSL2 | RAPGEF1 | CHRND | PABPC1L2B | IL18 | SUCLG2 |
| AGER | MKNK1 | FOXO3 | RAPGEF3 | CLDN15 | PABPC4 | IL18R1 | SV2A |
| AGRN | MLH1 | FPR1 | RARA | CLDN18 | PABPC4L | IL19 | SV2B |
| AGTR1 | MLH3 | FRAS1 | RARS1 | CLDN2 | PAK3 | IL1A | SYF2 |
| AHCTF1 | MLN | FREM1 | RARS2 | CLDN3 | PAK4 | IL1B | TAAR1 |
| AKAP13 | MLST8 | FREM2 | RASGRP3 | CLDN5 | PAK5 | IL1R1 | TAAR9 |
| AKT1 | MME | FRMD8 | RASGRP4 | CLDN9 | PAPOLG | IL1R2 | TAC3 |
| AKT3 | MMP13 | FSHB | RB1 | CNGA4 | PARD3 | IL1RN | TACR2 |
| ALCAM | MMP15 | FSHR | RBM17 | CNOT10 | PARD6B | IL2 | TACR3 |
| ALOX15B | MMP16 | FYN | RBM22 | CNOT4 | PARD6G | IL20 | TAF1 |
| ALS2 | MMP17 | FZD1 | RBM8A | CNOT6L | PARK7 | IL20RB | TAF12 |
| ALYREF | MMP2 | FZD10 | RBPJ | CNOT7 | PARP2 | IL21R | TAF2 |
| ANGPT1 | MMP24 | FZD2 | RCL1 | CNOT9 | PARVB | IL22 | TAF5 |
| ANGPT2 | MMP9 | FZD4 | REL | CNR2 | PATE2 | IL23A | TAF5L |
| ANPEP | MNAT1 | FZD7 | RELA | CNTFR | PAX3 | IL23R | TAF7 |
| ANXA11 | MPHOSPH10 | FZD9 | RELB | CNTN2 | PCBP1 | IL25 | TAF7L |
| ANXA7 | MPPE1 | G6PC1 | RELL2 | COL1A1 | PCF11 | IL26 | TAF9 |
| APAF1 | MRPL1 | G6PC2 | RET | COL4A1 | PCK2 | IL27RA | TAF9B |
| APBB1IP | MRPL10 | G6PC3 | REXO2 | COL4A2 | PDCD1LG2 | IL2RB | TANK |
| APELA | MRPL11 | GABARAPL1 | RFC1 | COL4A4 | PDE2A | IL2RG | TAOK3 |
| APEX1 | MRPL15 | GABRA1 | RFC2 | COL4A6 | PDE3A | IL33 | TAP1 |
| APLNR | MRPL16 | GABRA3 | RFC3 | COMP | PDE3B | IL34 | TAPBP |
| APOA1 | MRPL22 | GABRA6 | RFC4 | COX6A2 | PDE4C | IL36G | TARDBP |
| APOA4 | MRPL23 | GABRB2 | RFC5 | COX6C | PDE4D | IL37 | TARS1 |
| APOB | MRPL24 | GABRB3 | RFNG | COX7A1 | PDE7A | IL3RA | TBP |
| APTX | MRPL27 | GABRD | RGS14 | COX7A2L | PDE8B | IL4 | TBPL1 |
| AQR | MRPL3 | GABRE | RHBDF1 | COX7B2 | PDGFA | IL4R | TBXA2R |
| ARHGAP35 | MRPL30 | GABRG2 | RHBDF2 | COX7C | PDGFB | IL5RA | TCERG1 |
| ARHGEF11 | MRPL32 | GABRQ | RIOK1 | COX8A | PDGFD | IL6 | TCF7L2 |
| ARNT2 | MRPL35 | GABRR2 | RIOK2 | COX8C | PDGFRA | IL7R | TCIRG1 |
| ARRB1 | MRPL36 | GABRR3 | RIPK3 | CPSF3 | PDGFRB | IMP4 | TCL1A |
| ATF6B | MRPL9 | GAD2 | RNASEH1 | CR1 | PDHA1 | INHA | TCL1B |
| ATG14 | MRPS10 | GALR1 | RNASEH2A | CRB3 | PDHB | INHBB | TDP1 |
| ATP1A3 | MRPS14 | GALR2 | RNASEH2B | CREB3L1 | PDSS1 | INHBC | TEC |
| ATP2A3 | MRPS16 | GAR1 | RND1 | CREB3L3 | PDYN | INS | TEK |
| ATP2B3 | MRPS17 | GATA3 | RNF31 | CREBBP | PECAM1 | INSL3 | TERT |
| ATP5F1A | MRPS18A | GATB | RNGTT | CRNKL1 | PELO | INSL5 | TFE3 |
| ATP5F1C | MRPS18C | GBP1 | ROCK1 | CSF1 | PENK | INSRR | TFEB |
| ATP5MC2 | MRPS7 | GBP2 | RPA1 | CSF2 | PF4 | IPO5 | TGFB1 |
| ATP5PB | MSH2 | GBP3 | RPA2 | CSF2RA | PF4V1 | IPO8 | TGFB2 |
| ATP5PO | MSH6 | GBP4 | RPL10L | CSF3 | PGF | IPO9 | TGFBR2 |
| ATP6AP1 | MSI1 | GCGR | RPL11 | CSF3R | PHKG2 | IRF1 | THBS1 |
| ATP6V0A1 | MST1 | GCM1 | RPL14 | CSH1 | PHLPP1 | IRF3 | THOC1 |
| ATP6V0A4 | MTFMT | GDF10 | RPL15 | CSH2 | PIAS1 | IRF7 | THOC6 |
| ATP6V0B | MTREX | GDF11 | RPL22 | CSNK2A2 | PIAS3 | IRF9 | THPO |
| ATP6V0C | MUC2 | GDF15 | RPL27A | CSNK2B | PIDD1 | IRGM | THRA |
| ATP6V0D1 | MUTYH | GDF2 | RPL28 | CSTF1 | PIGB | IRS1 | THRB |
| ATP6V0D2 | MVD | GDNF | RPL3 | CSTF2 | PIGC | ISG15 | TICAM1 |
| ATP6V1G3 | MX2 | GFAP | RPL30 | CSTF2T | PIGF | ISY1 | TIGIT |
| AVPR1B | MYL2 | GGPS1 | RPL38 | CTLA4 | PIGH | ITGA10 | TIRAP |
| AVPR2 | MYLK2 | GHR | RPL4 | CTNNA2 | PIGK | ITGA11 | TLN1 |
| AXIN2 | MYLK4 | GHRL | RPL5 | CTNNA3 | PIGL | ITGA2B | TLN2 |
| BAG4 | NARS1 | GHSR | RPL8 | CTNNB1 | PIGM | ITGA4 | TLR2 |
| BAIAP3 | NARS2 | GIPR | RPLP2 | CTSB | PIGN | ITGA5 | TLR9 |
| BAX | NAT10 | GLDC | RPP25L | CTSG | PIGO | ITGA7 | TLX1 |
| BCAP31 | NCBP2 | GLP1R | RPP30 | CUL4B | PIGP | ITGA8 | TMEM33 |
| BCAS2 | NCF2 | GLRA2 | RPP38 | CWC15 | PIGW | ITGAM | TNC |
| BCKDHB | NCOR1 | GLRA3 | RPP40 | CX3CL1 | PIGX | ITGB2 | TNF |
| BCL11B | NCR2 | GLUL | RPS11 | CXCL1 | PIGY | ITGB3 | TNFAIP3 |
| BCL2 | NCR3 | GNA11 | RPS16 | CXCL11 | PIK3AP1 | ITGB4 | TNFRSF10D |
| BCL2L1 | NDC1 | GNAI2 | RPS19 | CXCL12 | PIK3CB | ITGB6 | TNFRSF13C |
| BCL3 | NDUFA10 | GNAI3 | RPS21 | CXCL13 | PIK3R1 | ITGB8 | TNFRSF14 |
| BCL6 | NDUFA11 | GNAO1 | RPS23 | CXCL17 | PIK3R2 | ITK | TNFRSF18 |
| BDKRB1 | NDUFA6 | GNB2 | RPS27A | CXCL2 | PIK3R4 | ITPR1 | TNFRSF1A |
| BDKRB2 | NDUFA7 | GNB3 | RPS3 | CXCL8 | PIK3R5 | ITPR2 | TNFRSF1B |
| BIRC3 | NDUFA8 | GNG11 | RPS6 | CXCL9 | PIK3R6 | ITPR3 | TNFSF10 |
| BMP2 | NDUFA9 | GNG13 | RPS6KA2 | CXCR1 | PIP5K1A | JAG1 | TNFSF11 |
| BMP4 | NDUFB2 | GNG4 | RPS6KA4 | CXCR4 | PIP5K1B | JAK1 | TNFSF15 |
| BMP8A | NDUFB5 | GNG8 | RPS6KB2 | CYBA | PIP5K1C | JAK3 | TNFSF4 |
| BMS1 | NDUFB8 | GNGT1 | RRAS | CYBB | PKN1 | JAM2 | TNN |
| BRAF | NDUFB9 | GNGT2 | RRP7A | CYC1 | PLA2G4A | JUNB | TNNC1 |
| BTG3 | NDUFC1 | GNL2 | RSL24D1 | CYCS | PLAT | JUP | TNR |
| BUD31 | NDUFS1 | GNL3L | RUNX2 | CYP2A6 | PLAU | KARS1 | TPCN1 |
| C5AR1 | NDUFS3 | GNRH1 | RXFP3 | CYP2B6 | PLCB2 | KCNJ11 | TPH2 |
| C8A | NDUFS4 | GP5 | RXRG | CYP2C18 | PLCB3 | KCNJ12 | TPM3 |
| C9orf72 | NDUFV3 | GP9 | RYR2 | CYP2J2 | PLCD4 | KCNJ5 | TPM4 |
| CACNA1A | NECTIN1 | GPHA2 | RYR3 | CYSLTR1 | PLD2 | KCNJ6 | TPO |
| CACNA1B | NECTIN2 | GPR156 | S1PR1 | CYSLTR2 | PLRG1 | KCNN2 | TPR |
| CACNA1C | NEFM | GPR35 | S1PR3 | DAPK1 | PLXNA2 | KCNN3 | TRAF2 |
| CACNA1D | NEIL2 | GPR50 | S1PR5 | DAPK2 | PLXNA3 | KCNN4 | TRAP1 |
| CACNA1G | NFATC2 | GPSM3 | SAP18 | DCP1A | PLXNB1 | KCNQ1 | TREM2 |
| CACNA1S | NFATC4 | GPX2 | SARS1 | DCTN2 | PLXNB2 | KCNQ3 | TRHR |
| CACNA2D1 | NFE2L2 | GPX7 | SDHB | DCTN3 | PML | KCNQ5 | TRPC6 |
| CACNA2D4 | NFKB2 | GRIA1 | SDHD | DCTN4 | PMVK | KIF5B | TRPV2 |
| CACNB1 | NFKBIA | GRIA2 | SEH1L | DCTN6 | PNN | KIF5C | TSC2 |
| CACNB2 | NFKBIB | GRIA3 | SELE | DDIT3 | PNPT1 | KIR2DS4 | TSHR |
| CACNG1 | NHERF1 | GRID1 | SELL | DDX42 | POLA1 | KISS1R | TSPAN7 |
| CACNG2 | NHP2 | GRIK3 | SEM1 | DDX46 | POLB | KIT | TTN |
| CACNG4 | NKX3-1 | GRIK5 | SEMA3B | DDX6 | POLD3 | KLC1 | TUBA1B |
| CACNG5 | NLGN2 | GRIN1 | SEMA3C | DEFA6 | POLE2 | KLC4 | TUBA1C |
| CACNG7 | NLGN3 | GRIN2A | SEMA3D | DERL1 | POLE4 | KLK3 | TUBB2B |
| CACNG8 | NLGN4X | GRIN2C | SEMA3G | DHDDS | POLR2D | KMT2A | TUBB6 |
| CADM3 | NLGN4Y | GRIN3A | SEMA4A | DHX15 | POMP | KNG1 | TUBG2 |
| CALCR | NLRP1 | GRK2 | SEMA4B | DHX16 | POP1 | L1CAM | TXNIP |
| CALCRL | NMBR | GRK6 | SEMA5A | DHX36 | POP4 | LAMA4 | TXNL4A |
| CALM2 | NMD3 | GRM2 | SEMA5B | DHX8 | POP7 | LAMA5 | TYK2 |
| CALM3 | NMU | GRM4 | SEMA6B | DIS3 | PPBP | LAMB1 | TYMP |
| CALML4 | NMUR1 | GRP | SEMA6C | DIS3L | PPIE | LAMC1 | TYROBP |
| CALML6 | NMUR2 | GRPR | SEMA6D | DKC1 | PPIH | LAMC3 | U2AF1 |
| CALR | NOB1 | GSK3A | SEMA7A | DLAT | PPIL1 | LARS1 | U2AF2 |
| CAMK2A | NOD1 | GSPT2 | SENP2 | DLD | PPP1CA | LARS2 | UBB |
| CAMK2B | NOD2 | GTF2A1 | SERPINB13 | DLG2 | PPP1CC | LAT | UBE2G1 |
| CAMK2G | NODAL | GTF2B | SERPINB4 | DMD | PPP1R12A | LCK | UBE2I |
| CAMK4 | NOP10 | GTF2E1 | SF3A1 | DNAH12 | PPP1R12C | LCP2 | UBE2J1 |
| CARD11 | NOS1 | GTF2E2 | SF3B1 | DNAH14 | PPP2R1A | LDB1 | UBE2J2 |
| CARD16 | NOS2 | GTF2F2 | SF3B6 | DNAH2 | PPP2R1B | LEP | UBE2L3 |
| CARS1 | NOTCH3 | GTF2H1 | SH2D1A | DNAL4 | PPP2R2A | LEPR | UBQLN1 |
| CASC3 | NOX1 | GTF2H4 | SHARPIN | DOCK4 | PPP2R2B | LFNG | UBR4 |
| CASP1 | NPB | GTPBP4 | SHC1 | DOT1L | PPP2R2C | LHB | ULK2 |
| CASP10 | NPFFR1 | GUCY2D | SHC2 | DPYSL5 | PPP2R2D | LHCGR | UNC5A |
| CASP3 | NPW | GYPA | SHC3 | DRD2 | PPP2R3A | LIAS | UPF2 |
| CASP4 | NPY2R | GYPB | SIGLEC1 | DRD3 | PPP2R5B | LIFR | UPF3A |
| CASP8 | NPY4R | GYS1 | SIPA1 | DROSHA | PPP2R5C | LIG1 | UQCR11 |
| CASP9 | NR4A1 | GYS2 | SIPA1L1 | DSPP | PPP3CA | LIG3 | UQCRC2 |
| CASQ2 | NR4A2 | GZMB | SIRPA | DUSP10 | PPP3R1 | LILRA4 | UTP14A |
| CASR | NRCAM | H3C11 | SIRPB1 | DUSP5 | PPP3R2 | LILRA5 | UTP14C |
| CAV2 | NRP1 | H3C7 | SIX1 | DUSP6 | PPY | LILRB1 | UTP15 |
| CAV3 | NRXN2 | HAP1 | SIX4 | DUSP8 | PQBP1 | LILRB3 | UTP18 |
| CCDC12 | NTF3 | HBS1L | SKIC8 | DVL1 | PRF1 | LIMK1 | UTP4 |
| CCL1 | NTN4 | HCN1 | SLC12A5 | E2F1 | PRIM1 | LIPT1 | UTP6 |
| CCL11 | NTNG2 | HCN2 | SLC18A2 | E2F2 | PRIM2 | LLGL1 | UTS2 |
| CCL16 | NTRK1 | HCN3 | SLC25A4 | E2F3 | PRKACA | LMNA | UTS2R |
| CCL18 | NTRK2 | HCRTR1 | SLC25A5 | EARS2 | PRKACB | LMO2 | VAPB |
| CCL19 | NTRK3 | HCRTR2 | SLC25A6 | EDA2R | PRKACG | LPAR2 | VAV1 |
| CCL2 | NTS | HCST | SLC32A1 | EDC3 | PRKCA | LPAR3 | VAV2 |
| CCL20 | NTSR2 | HEATR1 | SLC34A2 | EDN1 | PRKCB | LPAR4 | VCAM1 |
| CCL21 | NUDT21 | HES1 | SLC34A3 | EEF1A1 | PRKD2 | LPAR6 | VDR |
| CCL22 | NUP107 | HES2 | SLC38A3 | EFL1 | PRKG2 | LRP1 | VEGFA |
| CCL23 | NUP133 | HES4 | SLC38A5 | EFNA3 | PRL | LRRC4C | VEGFB |
| CCL26 | NUP155 | HEY1 | SLC39A10 | EFNA5 | PRPF18 | LSM2 | VEGFC |
| CCL27 | NUP160 | HEYL | SLC39A2 | EFNB1 | PRPF19 | LSM4 | VGF |
| CCL4 | NUP205 | HGF | SLC39A6 | EFNB3 | PRPF38A | LSM5 | VIP |
| CCL5 | NUP210L | HHEX | SLC39A8 | EFTUD2 | PRPF4 | LSM6 | VIPR1 |
| CCND1 | NUP35 | HLA-A | SLC39A9 | EGFR | PRPF40A | LSM7 | VIPR2 |
| CCND3 | NUP37 | HLA-DRA | SLC45A3 | EIF2AK3 | PRPF6 | LSM8 | VSIR |
| CCNH | NUP43 | HLA-DRB1 | SLC5A7 | EIF2S1 | PRPH | LTA | VTCN1 |
| CCNT2 | NUP54 | HLA-E | SLC6A1 | EIF4A3 | PRSS1 | LYL1 | VWF |
| CCR1 | NUP58 | HMGCR | SLC6A11 | EIF6 | PRSS3 | LYPD6 | WARS2 |
| CCR3 | NUP62 | HMGCS1 | SLC6A13 | ELANE | PSMA1 | MADCAM1 | WDR3 |
| CCR4 | NUP88 | HNRNPA1 | SLC6A4 | ELMO1 | PSMA2 | MAFB | WDR33 |
| CCR6 | NUP93 | HNRNPA3 | SLC8A1 | EMG1 | PSMA3 | MAG | WDR36 |
| CCR7 | NUP98 | HNRNPC | SLC8A2 | ENAH | PSMA5 | MAGI1 | WDR41 |
| CD14 | NXF3 | HNRNPK | SLC8A3 | EPHA2 | PSMA6 | MAGOH | WNK1 |
| CD19 | NXT1 | HNRNPM | SLITRK1 | EPHA4 | PSMB1 | MAGOHB | WNK2 |
| CD1B | OAS2 | HNRNPU | SLITRK2 | EPHA8 | PSMB3 | MAML3 | WNT1 |
| CD1C | OAS3 | HRAS | SLITRK3 | EPHB6 | PSMB4 | MAOA | WNT10A |
| CD2 | OASL | HRC | SLITRK4 | EPOR | PSMB5 | MAOB | WNT10B |
| CD27 | OPRD1 | HRH2 | SLITRK6 | EPRS1 | PSMB6 | MAP1LC3A | WNT11 |
| CD276 | OPRK1 | HRH3 | SLN | ERBB2 | PSMB7 | MAP1LC3C | WNT2 |
| CD28 | OPRL1 | HRH4 | SLU7 | ERBB4 | PSMB8 | MAP2K3 | WNT2B |
| CD36 | OPRM1 | HSP90AA1 | SLURP1 | ERBIN | PSMC2 | MAP2K7 | WNT5A |
| CD3D | OR10A3 | HSP90B1 | SNCAIP | ERCC3 | PSMC3 | MAP3K11 | WNT7A |
| CD4 | OR10H2 | HSPA1A | SNRPB | ERO1A | PSMC5 | MAP3K12 | XBP1 |
| CD40 | OR14J1 | HSPA1B | SNRPB2 | ESR2 | PSMD11 | MAP3K3 | XCR1 |
| CD40LG | OR1C1 | HSPA1L | SNRPC | ETV4 | PSMD12 | MAP3K5 | XPO1 |
| CD47 | OR1D2 | HSPA5 | SNRPD1 | ETV6 | PSMD13 | MAP3K8 | XPO7 |
| CD48 | OR1F1 | HSPA6 | SNRPD3 | ETV7 | PSMD14 | MAP3K9 | XPOT |
| CD6 | OR1G1 | HSPA9 | SNRPF | EVL | PSMD4 | MAPK11 | XRN1 |
| CD7 | OR1J2 | HSPG2 | SNTA1 | EXOSC1 | PSMD6 | MAPK13 | XRN2 |
| CD80 | OR2B6 | HTR1A | SNTB1 | EXOSC2 | PSMD7 | MAPK14 | YARS1 |
| CD86 | OR2C1 | HTR3A | SNUPN | EXOSC3 | PSMD8 | MAPK3 | YARS2 |
| CD99 | OR2F1 | HTR3B | SNW1 | EXOSC6 | PSMD9 | MAPK8 | ZAP70 |
| CDC25B | OR2H1 | HTR3C | SOCS3 | EXOSC7 | PSMF1 | MAPK8IP1 | ZBTB16 |
| CDC40 | OR2J2 | HTR4 | SOD1 | EXOSC9 | PSPN | MAPK8IP3 | ZCCHC7 |
| CDC42 | OR2J3 | HTR6 | SOD2 | EYA1 | PTCH1 | MAPK9 | ZMPSTE24 |
| CDC5L | OR3A1 | IARS1 | SOST | F11R | PTGER1 | MAPT | ZYX |

Table S6 Performance metric of Machine Learning

| Machine Learning | AUC | Accuracy | Precision | Recall | F1-score |
| --- | --- | --- | --- | --- | --- |
| Lasso | 0.8958 | 0.8636 | 0.8824 | 0.9375 | 0.9091 |
| XGBoost | 0.8212 | 0.8727 | 0.8333 | 0.6667 | 0.7407 |
| Random Forest | 0.7083 | 0.7273 | 0.8125 | 0.8125 | 0.8125 |
